# Supplementary material
Source: PubMed Central journal article supplement (PMC1765420)

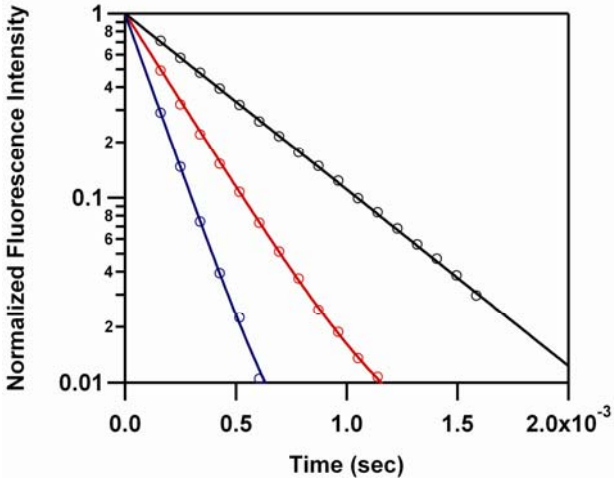

Supplement: pnas_0609413103_1.pdf [file pnas_0609413103_1.pdf]

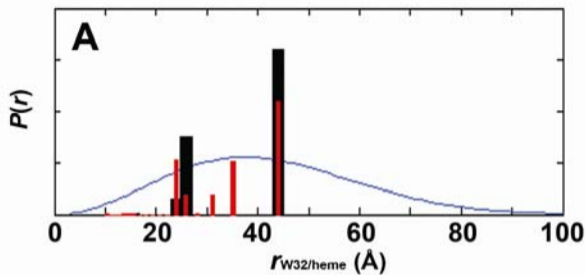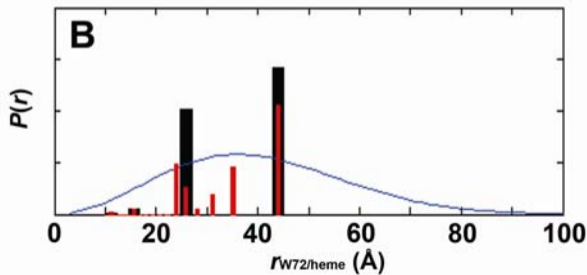

Supplement: pnas_0609413103_2.pdf [file pnas_0609413103_2.pdf]

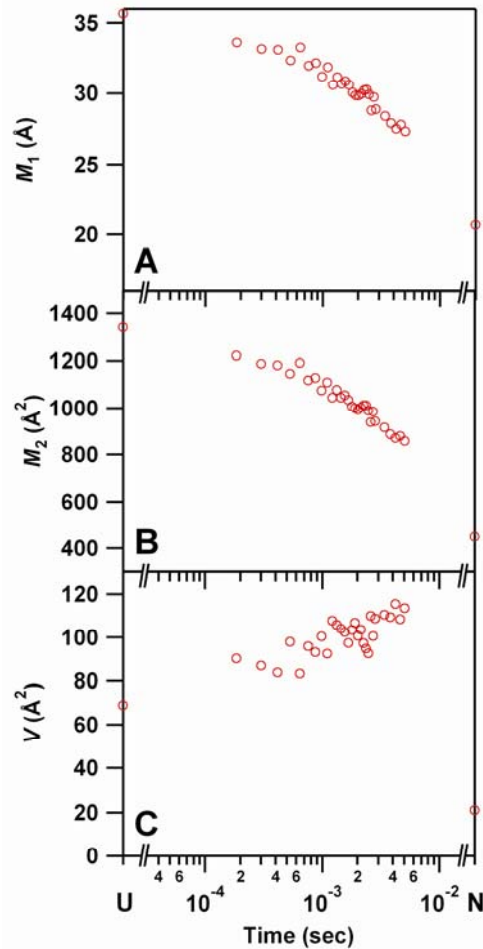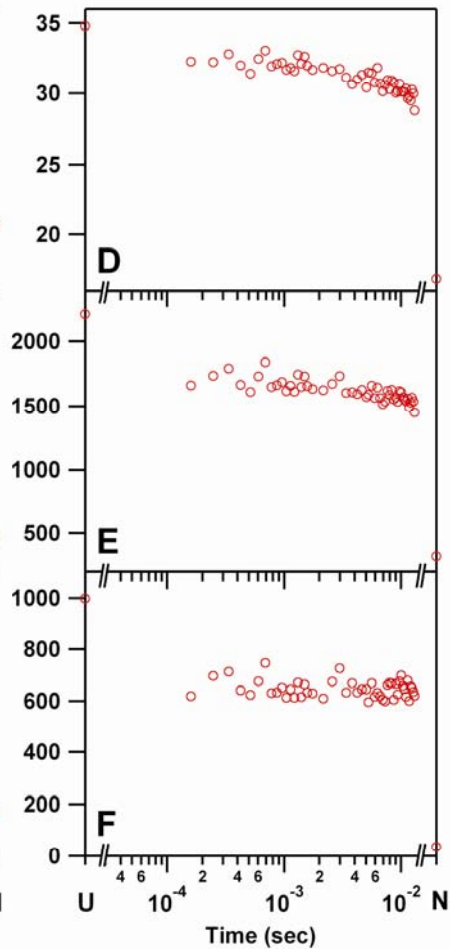

Supplement: pnas_0609413103_3.pdf [file pnas_0609413103_3.pdf]
